# Supplementary material for: Gaps in Modern Heart Failure and Chronic Kidney Disease Research
Source: PubMed Central journal article supplement — Eur Cardiol. 2023 Aug 23;18:e51. doi: 10.15420/ecr.2022.64 (PMC10481380; doi:10.15420/ecr.2022.64), 2023-08-23
Supplement: ecr-18-e51-Supp.pdf [file ecr-18-e51-Supp.pdf]

**Table 1: Major heart failure clinical trials**

| Clinical Trial          | Year | Population and Intervention            | n    | Females | Age (Years) | Renal Function*                         | CKD | Renal Exclusion Criteria | Key Findings                                                            |
|-------------------------|------|----------------------------------------|------|---------|-------------|-----------------------------------------|-----|--------------------------|-------------------------------------------------------------------------|
| CONSENSUS <sup>1</sup>  | 1988 | Enalapril vs placebo in HF NYHA IV     | 253  | 30%     | 71          | Cr 128 µmol/L                           | NA  | Cr >300 µmol/L           | Enalapril reduced mortality and improved symptoms                       |
| SOLVD <sup>2</sup>      | 1992 | Enalapril vs placebo in HFrEF          | 4228 | 11.4%   | 59.1        | Cr 106 µmol/L                           | 21% | Cr >177 µmol/L           | Enalapril reduced incidence and hospitalisations for HF                 |
| CIBIS-II <sup>3</sup>   | 1999 | Bisoprolol vs placebo in HFrEF         | 2647 | 19.5%   | 61 (24-80)  | NA                                      | NA  | Cr >300 µmol/L           | Bisoprolol reduced mortality, hospitalisations, and sudden death        |
| RALES <sup>4</sup>      | 1999 | Spironolactone vs placebo in severe HF | 1663 | 27%     | 65 ± 12     | NA                                      | 48% | Cr >221 µmol/L           | Along with usual therapy spironolactone reduced morbidity and mortality |
| I-PRESERVE <sup>5</sup> | 2008 | Irbesartan vs placebo in HFpEF         | 4128 | 60%     | 72.7 ± 7    | eGFR 73 ± 23 ml/min/1.73 m <sup>2</sup> | 31% | Cr >221 µmol/L           | Irbesartan did not improve composite of death from                      |

|                          |      |                                                     |      |       |             |                                         |     |                                                             |                                                                                                                                     |
|--------------------------|------|-----------------------------------------------------|------|-------|-------------|-----------------------------------------|-----|-------------------------------------------------------------|-------------------------------------------------------------------------------------------------------------------------------------|
|                          |      |                                                     |      |       |             |                                         |     |                                                             | any cause or CVD hospitalisations                                                                                                   |
| EMPHASIS-HF <sup>6</sup> | 2011 | Eplerenone vs placebo in symptomatic HFrEF (EF<35%) | 2737 | 22.3% | 67.7 ± 7.7  | eGFR 70.8 ml/min/1.73 m <sup>2</sup>    | 33% | eGFR <30 ml/min/1.73 m <sup>2</sup>                         | Eplerenone reduced risk of death and hospitalisations                                                                               |
| TOPCAT <sup>7</sup>      | 2014 | Spirolactone vs placebo in HFpEF                    | 3445 | 51.6% | 68.7        | eGFR 65.4 ml/min/1.73 m <sup>2</sup>    | 39% | eGFR <30 ml/min/1.73 m <sup>2</sup> or serum Cr >221 µmol/L | Spirolactone non-statistically significantly reduced the composite outcome of CVD death, hospitalisation, or aborted cardiac arrest |
| PARADIGM-HF <sup>8</sup> | 2014 | Entresto vs enalapril in HFrEF                      | 8399 | 21.8% | 63.8 ± 11.4 | Cr 99.9 ± 26.5 µmol/L                   | 33% | eGFR <30 ml/min/1.73 m <sup>2</sup>                         | Entresto was superior to enalapril in reducing risk of death and hospitalisations for H                                             |
| PARAGON-HF <sup>9</sup>  | 2019 | Entresto vs valsartan in HFpEF                      | 4796 | 51.7% | 72.8 ± 8.4  | eGFR 63 ± 19 ml/min/1.73 m <sup>2</sup> | NA  | eGFR <30 ml/min/1.73 m <sup>2</sup>                         | Entresto non-statistically significantly reduced total and HF admissions                                                            |

|                                 |      |                                                     |      |       |             |                                             |     |                                     |                                                                                                                                                                                                                     |
|---------------------------------|------|-----------------------------------------------------|------|-------|-------------|---------------------------------------------|-----|-------------------------------------|---------------------------------------------------------------------------------------------------------------------------------------------------------------------------------------------------------------------|
| DAPA-HF <sup>10</sup>           | 2019 | Dapagliflozin vs placebo in NYHA II-IV and EF <40%. | 4744 | 23.4% | 66.3 ± 10.9 | eGFR 65.8 ± 19.4 ml/min/1.73 m <sup>2</sup> | 41% | eGFR <30 ml/min/1.73 m <sup>2</sup> | Regardless of diabetes status dapagliflozin reduced the risk of worsening HF or cardiovascular death                                                                                                                |
| EMPEROR-Reduced <sup>11</sup>   | 2020 | Empagliflozin vs placebo in NYHA II-IV and EF <40%. | 3730 | 23.9% | 66.5 ± 11.2 | eGFR 62.2 ± 21.5 ml/min/1.73 m <sup>2</sup> | 53% | eGFR <20 ml/min/1.73 m <sup>2</sup> | Regardless of diabetes status, empagliflozin reduced the risk of cardiovascular death or HF hospitalisations. Empagliflozin also reduced the rate of decline in eGFR and lowered the risk of serious renal outcomes |
| EMPEROR-Preserved <sup>12</sup> | 2021 | Empagliflozin vs placebo in NYHA II-IV and EF >40%  | 5988 | 44.7% | 71.9 ± 9.6  | eGFR 60.6 ± 19.9 ml/min/1.73 m <sup>2</sup> | NA  | eGFR <20 ml/min/1.73 m <sup>2</sup> | Regardless of diabetes status, empagliflozin reduced the risk of cardiovascular death or HF hospitalisations                                                                                                        |

|                               |      |                                                                                                                      |      |       |            |                                                  |    |                                     |                                                                                 |
|-------------------------------|------|----------------------------------------------------------------------------------------------------------------------|------|-------|------------|--------------------------------------------------|----|-------------------------------------|---------------------------------------------------------------------------------|
| SOLOIST-<br>WHF <sup>13</sup> | 2021 | Sotagliflozin vs placebo in patients with diabetes mellitus admitted to hospital with worsening HF, regardless of EF | 1222 | 33.7% | 70 [64–76] | eGFR 49.7 [40.5–64.6] ml/min/1.73 m <sup>2</sup> | NA | eGFR <30 ml/min/1.73 m <sup>2</sup> | Sotagliflozin reduced the number of cardiovascular deaths and hospitalisations  |
| DELIVER <sup>14</sup>         | 2022 | Dapagliflozin vs placebo in HFpEF (EF >40%)                                                                          | 6263 | 43.9% | 71.7 ± 9.6 | eGFR 61.0 ± 19.9 ml/min/1.73 m <sup>2</sup>      | NA | eGFR <25 ml/min/1.73 m <sup>2</sup> | Dapagliflozin reduced the combined risk of worsening HF or cardiovascular death |

CKD = chronic kidney disease defined as eGFR <60 ml/min/1.73 m<sup>2</sup>; Cr = creatinine; CVD = cardiovascular disease; EF = ejection fraction; eGFR = estimated glomerular filtration rate; HF = heart failure; HFpEF = heart failure with preserved ejection fraction; HFrEF = heart failure with reduced ejection fraction; NA = not available; NYHA = New York Heart Association Functional Classification.

\*Age and kidney function are represented as a mean, mean ± standard deviation, mean (range), or median [interquartile range].

## References

1. CONSENSUS Trial Study Group. Effects of enalapril on mortality in severe congestive heart failure. Results of the Cooperative North Scandinavian Enalapril Survival Study (CONSENSUS). *N Engl J Med*. 1987;316:1429-35. <https://doi.org/10.1056/NEJM198706043162301>; PMID: 2883575.
2. SOLVD Investigators; Yusuf S, Pitt B, et al. Effect of enalapril on mortality and the development of heart failure in asymptomatic patients with reduced left ventricular ejection fractions. *N Engl J Med*. 1992;327:685-91. <https://doi.org/10.1056/NEJM199209033271003>; PMID: 1463530.
3. The Cardiac Insufficiency Bisoprolol Study II (CIBIS-II): a randomised trial. *Lancet*. 1999 Jan 2;353:9-13. [https://doi.org/10.1016/S0140-6736\(98\)11181-9](https://doi.org/10.1016/S0140-6736(98)11181-9); PMID: 10023943.
4. Pitt B, Zannad F, Remme WJ, et al. The effect of spironolactone on morbidity and mortality in patients with severe heart failure. Randomized Aldactone Evaluation Study Investigators. *N Engl J Med*. 1999;341:709-17. <https://doi.org/10.1056/NEJM199909023411001>; PMID: 10471456.
5. Massie BM, Carson PE, McMurray JJ, et al. Irbesartan in patients with heart failure and preserved ejection fraction. *N Engl J Med*. 2008;359:2456-67. <https://doi.org/10.1056/NEJMoa0805450>; PMID: 19001508; epub ahead of press.
6. Zannad F, McMurray JJ, Krum H, et al. Eplerenone in patients with systolic heart failure and mild symptoms. *N Engl J Med*. 2011;364:11-21. <https://doi.org/10.1056/NEJMoa1009492>; PMID: 21073363; epub ahead of press.
7. Pitt B, Pfeffer MA, Assmann SF, et al. Spironolactone for heart failure with preserved ejection fraction. *N Engl J Med*. 2014;370:1383-92. <https://doi.org/10.1056/NEJMoa1313731>; PMID: 24716680.
8. McMurray JJ, Packer M, Desai AS, et al. Angiotensin-neprilysin inhibition versus enalapril in heart failure. *N Engl J Med*. 2014;371:993-1004. <https://doi.org/10.1056/NEJMoa1409077>; PMID: 25176015; epub ahead of press.
9. Solomon SD, McMurray JJV, Anand IS, et al. Angiotensin-Nepriylsin Inhibition in Heart Failure with Preserved Ejection Fraction. *N Engl J Med*. 2019;381:1609-20. <https://doi.org/10.1056/NEJMoa1908655>; PMID: 31475794; epub ahead of press.

10. McMurray JJV, Solomon SD, Inzucchi SE, et al. Dapagliflozin in Patients with Heart Failure and Reduced Ejection Fraction. *N Engl J Med*. 2019;381:1995-2008. <https://doi.org/10.1056/NEJMoa1911303>; PMID: 31535829; epub ahead of press.
11. Packer M, Anker SD, Butler J, et al. Cardiovascular and Renal Outcomes with Empagliflozin in Heart Failure. *N Engl J Med*. 2020;383:1413-24. <https://doi.org/10.1056/NEJMoa2022190>; PMID: 32865377; epub ahead of press.
12. Anker SD, Butler J, Filippatos G, et al. Empagliflozin in Heart Failure with a Preserved Ejection Fraction. *N Engl J Med*. 2021;385:1451-61. <https://doi.org/10.1056/NEJMoa2107038>; PMID: 34449189; epub ahead of press.
13. Bhatt DL, Szarek M, Steg PG, et al. Sotagliflozin in Patients with Diabetes and Recent Worsening Heart Failure. *N Engl J Med*. 2021;384:117-28. <https://doi.org/10.1056/NEJMoa2030183>; PMID: 33200892; epub ahead of press.
14. Solomon SD, McMurray JJV, Claggett B, et al. Dapagliflozin in Heart Failure with Mildly Reduced or Preserved Ejection Fraction. *N Engl J Med*. 2022;387:1089-98. <https://doi.org/10.1056/NEJMoa2206286>; PMID: 36027570; epub ahead of press.
